# Supplementary material for: Castanea sativa Mill. Leaf: UHPLC-HR MS/MS Analysis and Effects on In Vitro Rumen Fermentation and Methanogenesis
Source: MDPI journal article supplement (doi:10.3390/molecules27248662), 2022-12-07
Supplement: s1 [file s1]

# ***Castanea sativa* Mill. leaf: UHPLC-ESI-QqTOF analysis and effects on *in vitro* rumen fermentation and methanogenesis**

M. Formato,<sup>1</sup> A. Vastolo,<sup>2</sup> S. Piccolella,<sup>1</sup> S. Calabrò,<sup>2</sup> M.I. Cutrignelli,<sup>2</sup> C. Zidorn,<sup>3</sup> S. Pacifico<sup>1</sup>

<sup>1</sup>Department of Environmental, Biological and Pharmaceutical Sciences and Technologies, University of Campania ‘Luigi Vanvitelli’, Via Vivaldi 43, 81100 Caserta, Italy

<sup>2</sup>Department of Veterinary Medicine and Animal Production, University of Naples Federico II, Via Federico Delpino 1 – 80137, Napoli, Italy

<sup>3</sup>Pharmazeutisches Institut, Abteilung Pharmazeutische Biologie, Christian-Albrechts-Universität zu Kiel, Gutenbergstraße 76, 24118 Kiel, Germany

## **Supplement Materials**

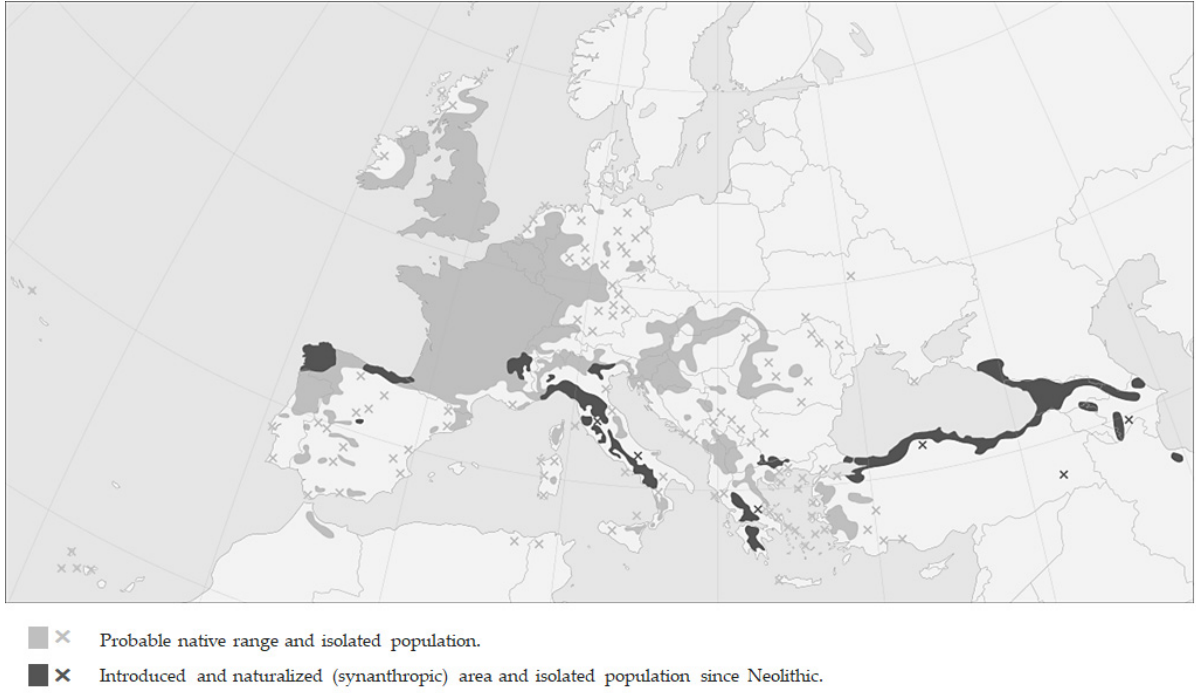

**Figure S1.** Worldwide distribution of *Castanea sativa* Mill. (readapted from <https://www.euforgen.org/species/castanea-sativa/>)

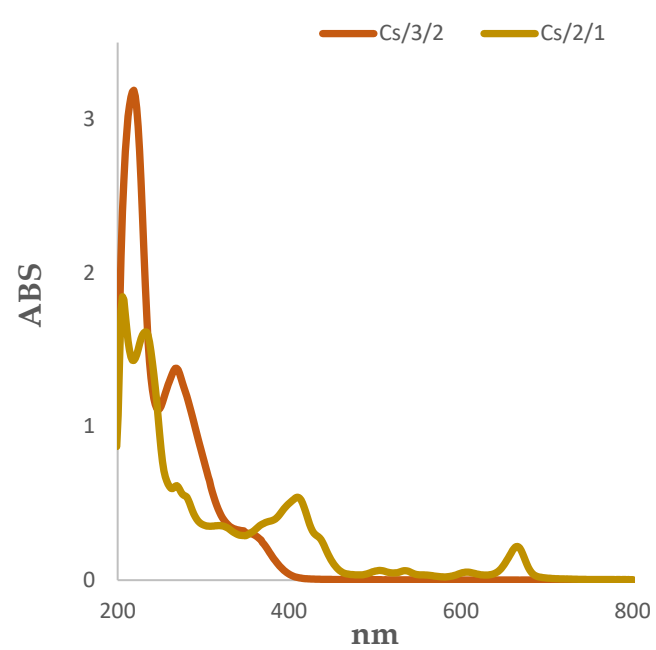

**Figure S2.** UV/Visible spectra of fractions Cs/2/1 and Cs/3/2.

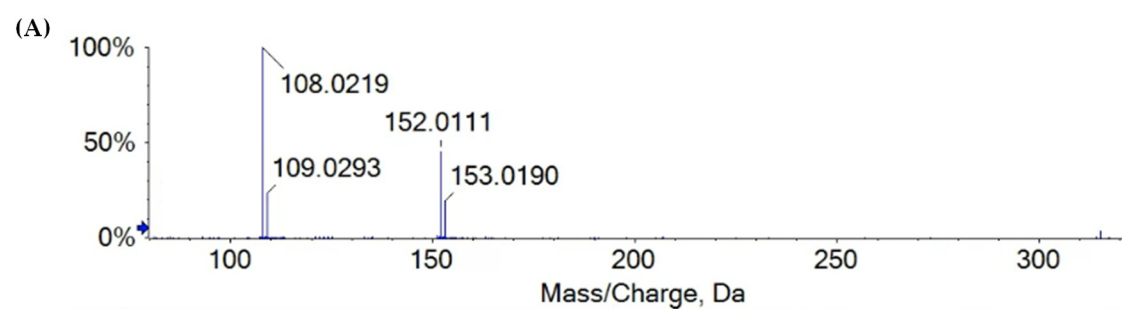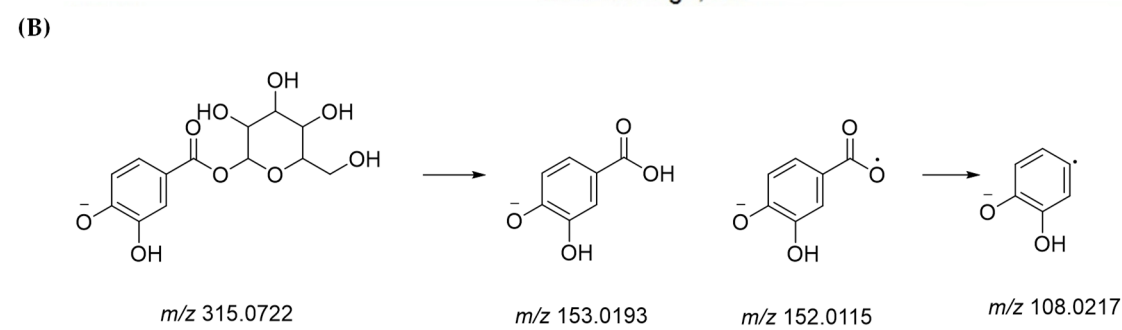

**Figure S3.** (A) TOF-MS/MS spectrum of compound **10**, (B) putative fragmentation patterns; theoretical mass is reported under each structure.

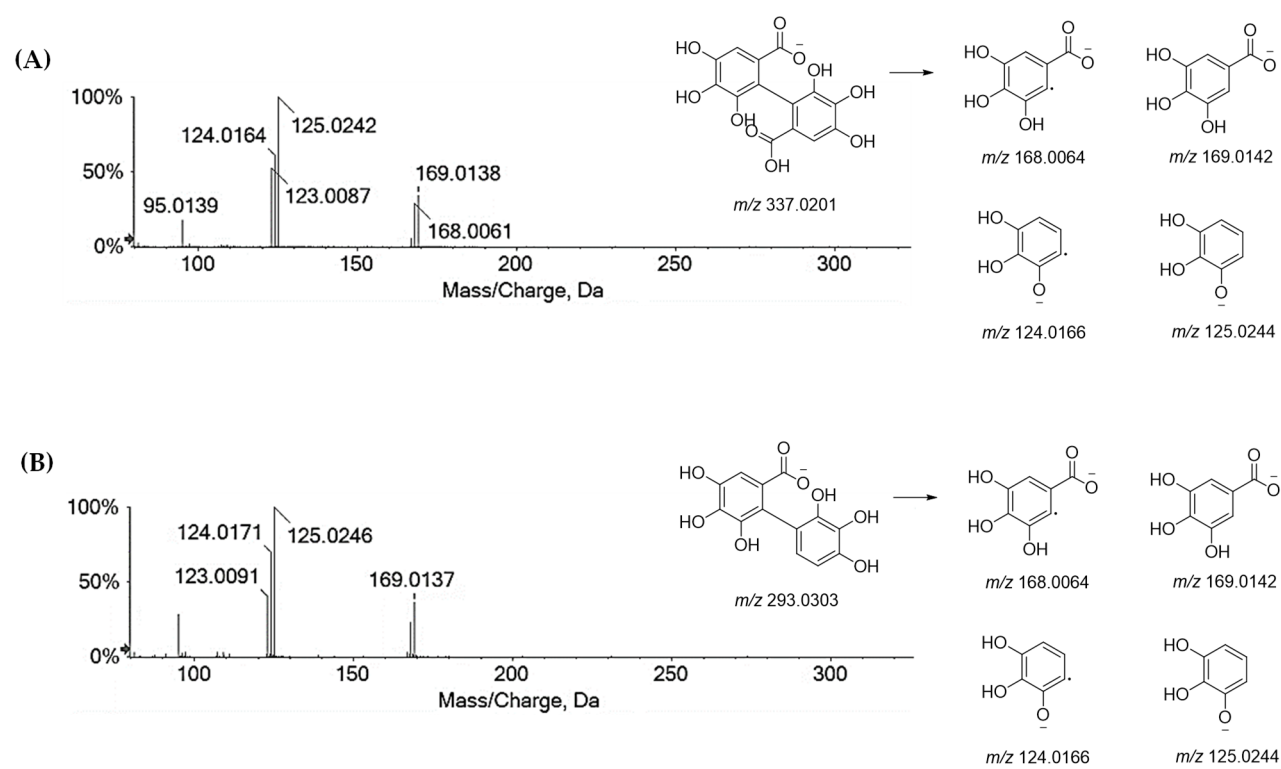

**Figure S4.** TOF-MS/MS spectra of (A) compound 4 and (B) compound 3. Putative fragmentation patterns are depicted; theoretical mass is reported under each structure.

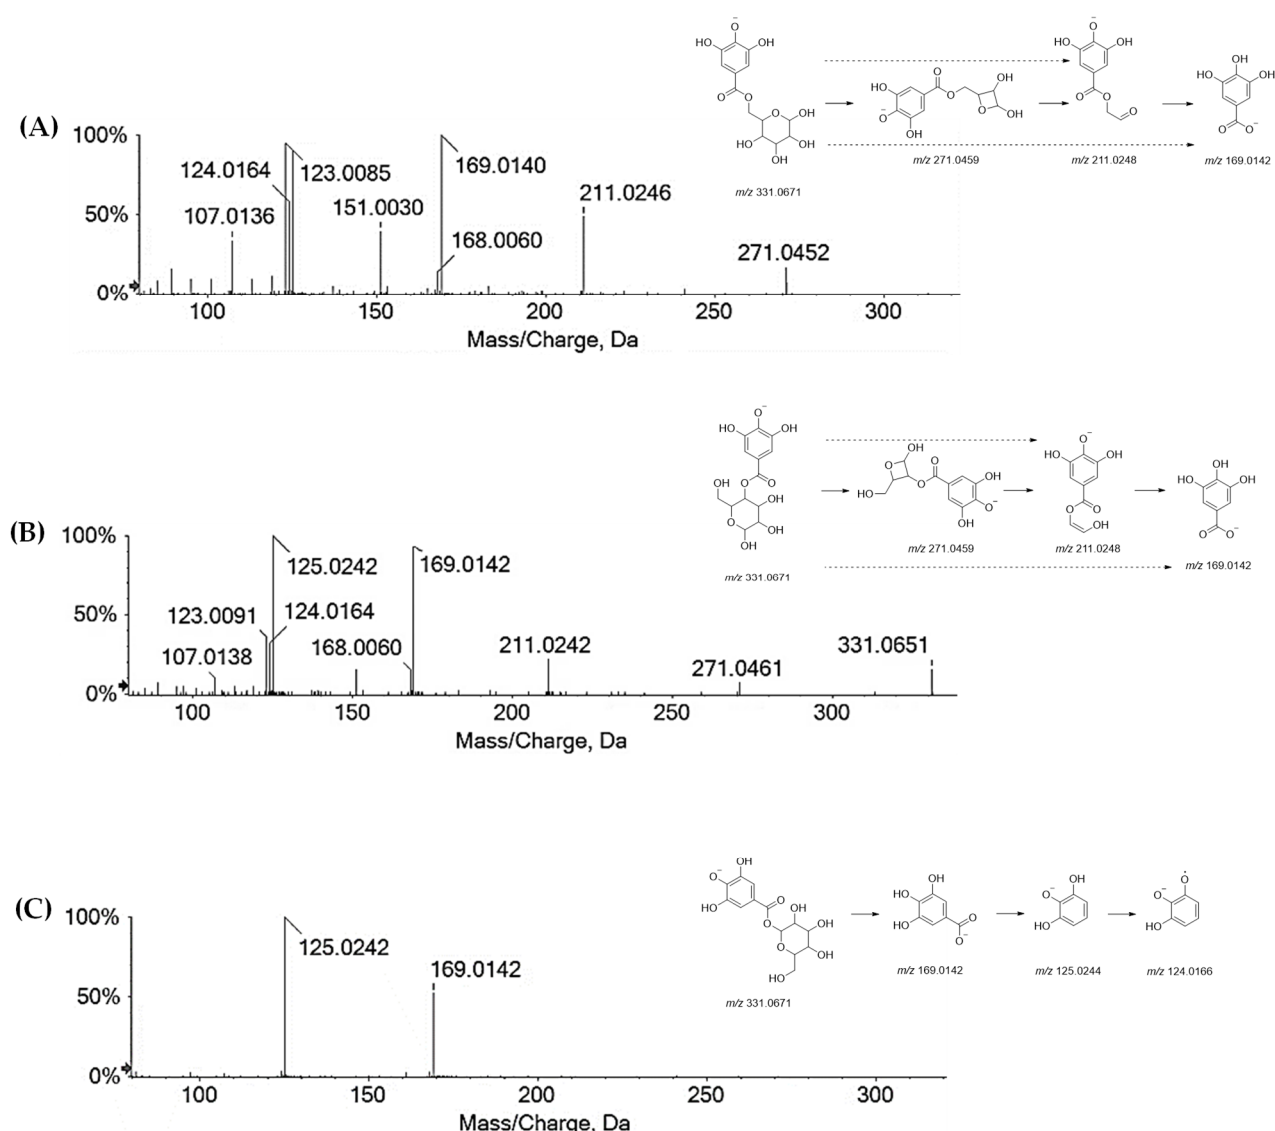

**Figure S5.** Galloyl hexose isomers (2, 6, 12) TOF-MS/MS spectra. **(A)** Compound 2; **(B)** compound 6; **(C)** compound 12. Putative fragmentation patterns are depicted; theoretical mass is reported under each structure.

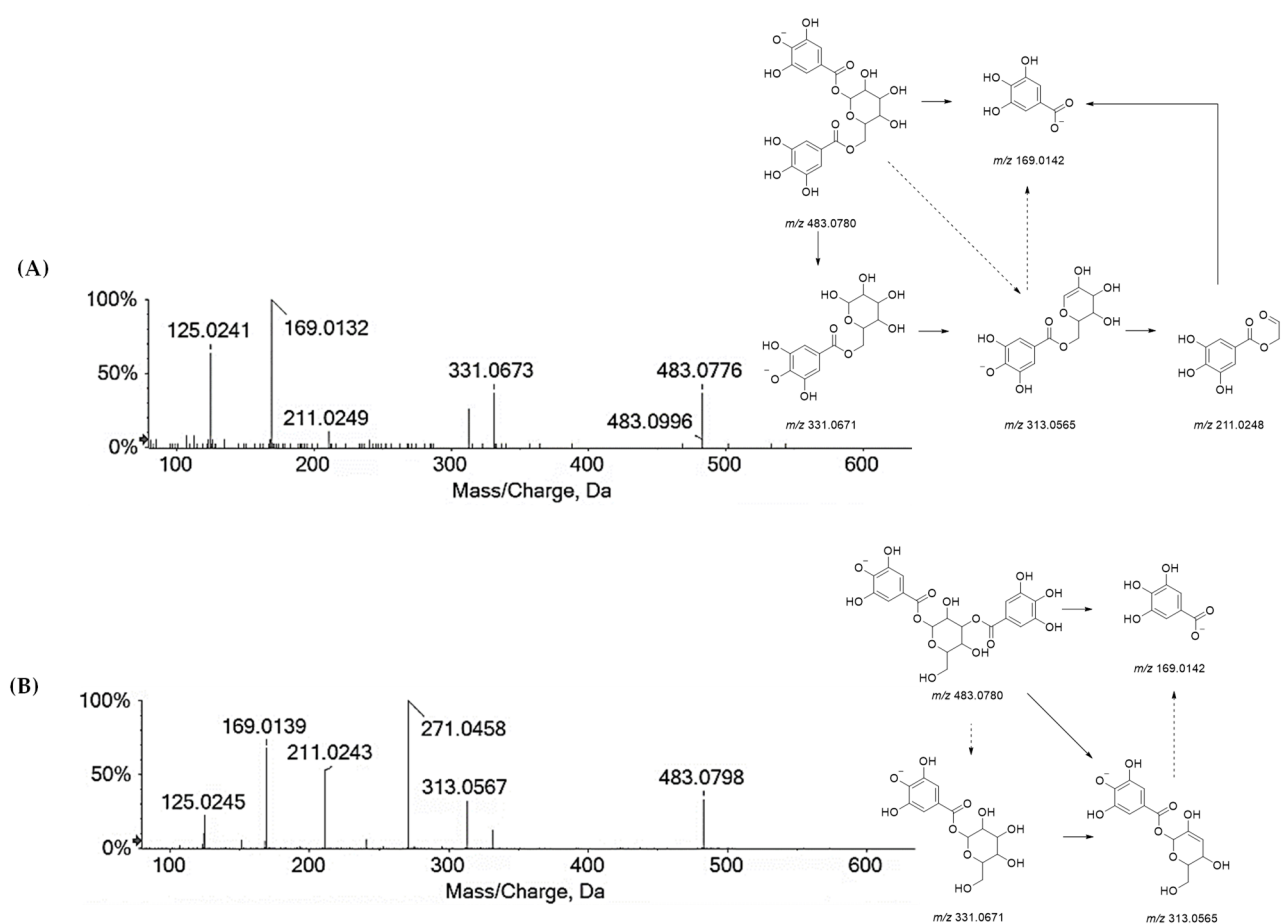

**Figure S6.** Digalloyl hexoses (A) 7, and (B) 30 TOF-MS/MS spectra and their putative fragmentation patterns; theoretical mass is reported under each structure.

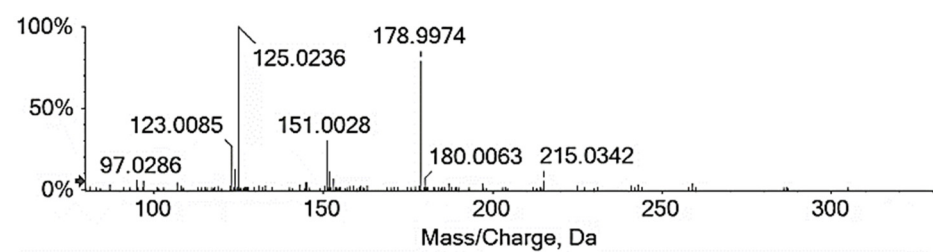

**Figure S7.** TOF-MS/MS spectra of compound **17**, tentatively identified as galloyl dihydroxybenzoic acid.

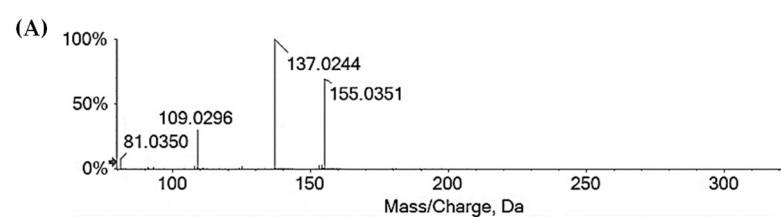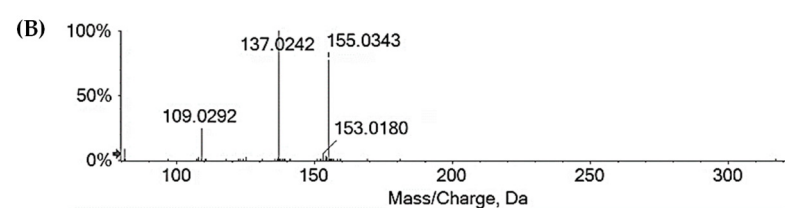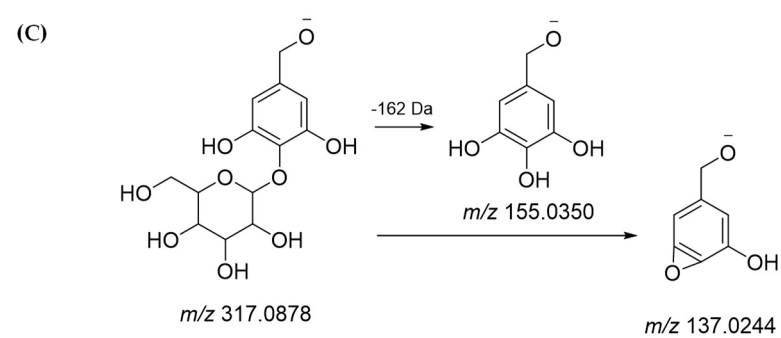

**Figure S8.** TOF-MS/MS spectra of compounds **8** (A) and **11** (B). In panel (C) the putative fragmentation pattern of compound **8** is depicted.



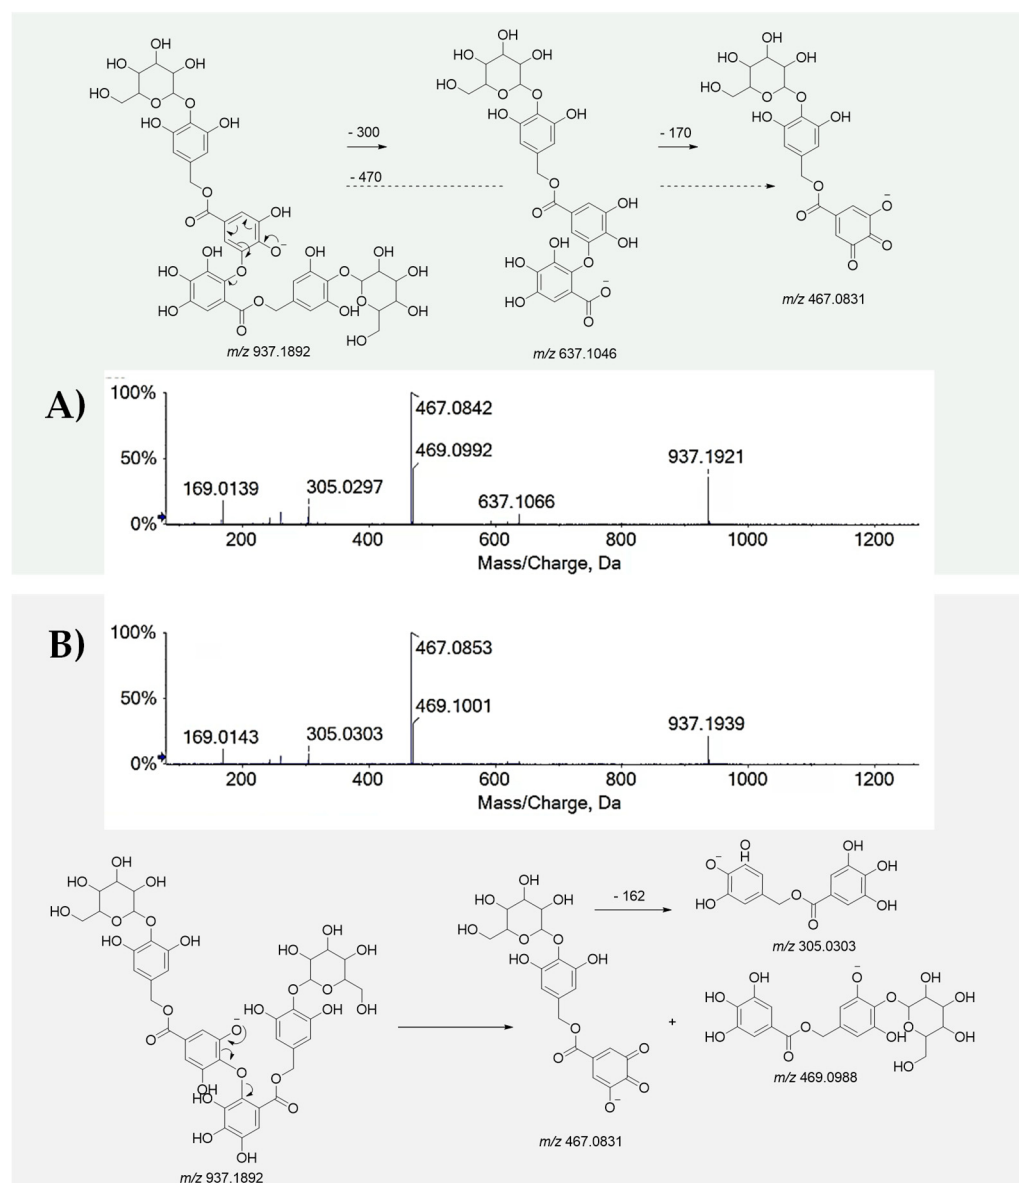

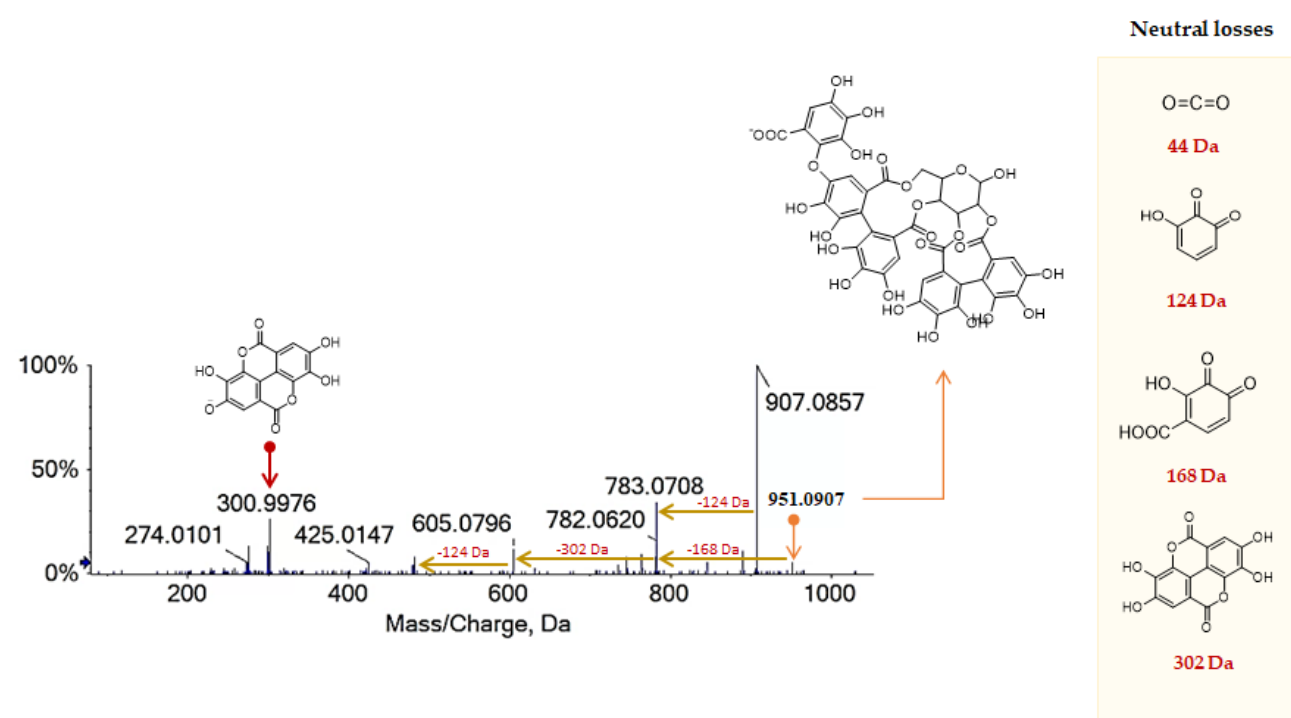

**Figure S10.** TOF-MS/MS spectra of compound 23 with  $[\text{M}-\text{H}]^-$  ion at  $m/z$  951.0907. Structures of observed neutral losses are depicted.

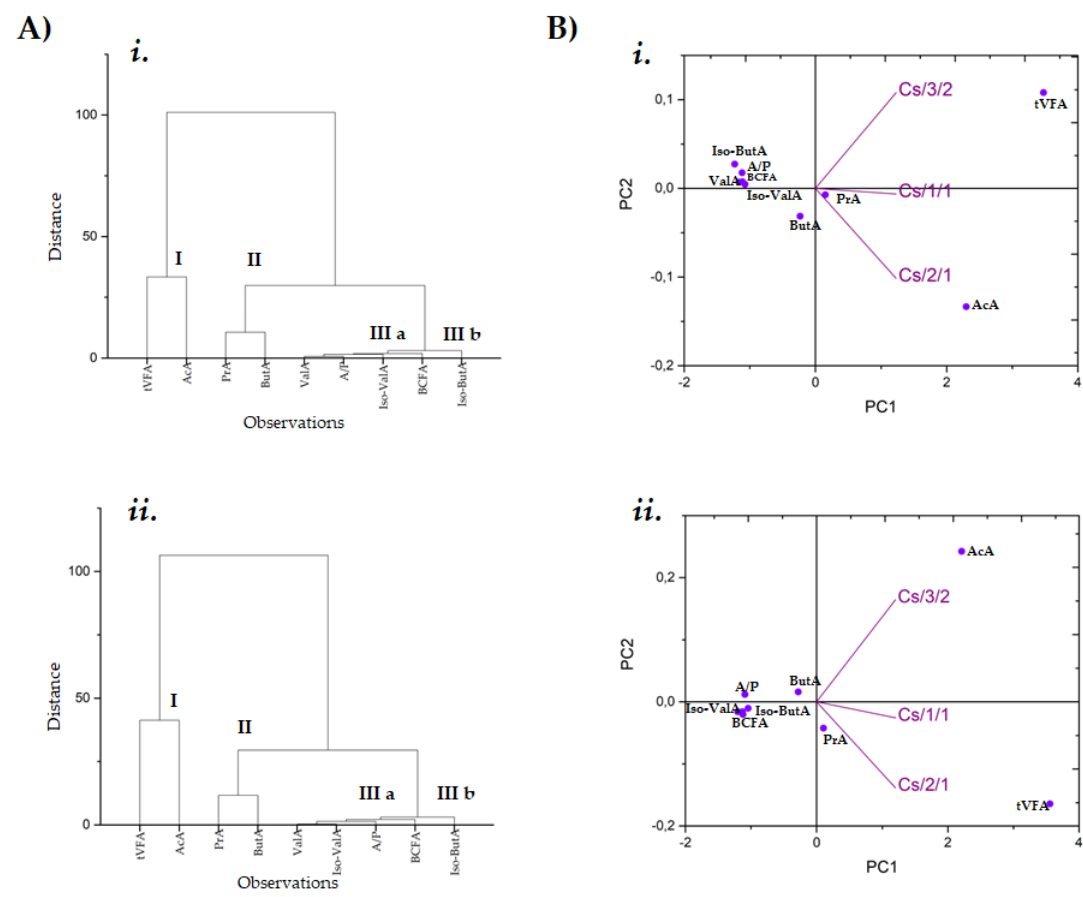

**Figure S11.** (A) Dendrograms of different volatile fatty acids obtained by treatment at 50 (*i.*) and 200 mg (*ii.*); (B) (*i.*) PCA (% variance on PC1 99.8; on PC2 0.2) of VFAs at 50 mg-dose level; (*ii.*) PCA (% variance on PC1 99.6; on PC2 0.4) of VFAs 200 of Cs/1/1, Cs/2/1 and Cs/3/2 fractions.

**Table S1.** Compounds tentatively identified in the chestnut Cs/1/1 alcoholic extract and its Cs/2/1 and Cs/3/2 fractions. Rt = retention time; RDB = ring double bond equivalent value. Base peak fragments are reported in bold.

| Peak | Rt    | Tentative assignment                                    | Formula                                         | [M-H]<br>found<br>( <i>m/z</i> )           | error<br>(ppm) | RDB | MS/MS fragment ions ( <i>m/z</i> ) and relative intensity                                                  |
|------|-------|---------------------------------------------------------|-------------------------------------------------|--------------------------------------------|----------------|-----|------------------------------------------------------------------------------------------------------------|
| 1    | 0.288 | Quinic acid                                             | C <sub>7</sub> H <sub>12</sub> O <sub>6</sub>   | 191.0562                                   | 0.5            | 2   | 191.0543; 127.0296; 93.0343; 87.0086; <b>85.0295</b>                                                       |
| 2    | 0.602 | Galloyl hexose I                                        | C <sub>13</sub> H <sub>16</sub> O <sub>10</sub> | 331.0670                                   | -0.2           | 6   | 331.0675; 271.0452; 211.0246; 169.0140; 151.0030; <b>125.0243</b> ; 124.0164; 107.0136                     |
| 3    | 0.680 | Pyrogallol gallic acid                                  | C <sub>13</sub> H <sub>10</sub> O <sub>8</sub>  | 293.0302                                   | 0.1            | 9   | 169.0130; 168.0056; <b>125.0238</b> ; 124.0161; 123.0081; 95.0132                                          |
| 4    | 0.680 | Hexahydroxydiphenic acid                                | C <sub>14</sub> H <sub>10</sub> O <sub>10</sub> | 337.0204                                   | 0.8            | 10  | 169.0142; <b>125.0243</b> ; 124.0163; 95.0137                                                              |
| 5    | 0.721 | Gallic acid                                             | C <sub>7</sub> H <sub>6</sub> O <sub>5</sub>    | 169.0151                                   | 5.0            | 5   | <b>125.0239</b> ; 124.0159                                                                                 |
| 6    | 0.776 | Galloyl hexose II                                       | C <sub>13</sub> H <sub>16</sub> O <sub>10</sub> | 331.0669                                   | -0.5           | 6   | 331.0651; 271.0461; 211.0242; 169.0142; 151.0034; <b>125.0242</b> ; 124.0164; 107.0138                     |
| 7    | 1.008 | Digalloyl hexose                                        | C <sub>20</sub> H <sub>20</sub> O <sub>14</sub> | 483.0785                                   | 1.0            | 11  | 483.0776; 331.0673; 313.0544; 211.0249; <b>169.0132</b> ; 125.0241                                         |
| 8    | 1.124 | 3,4,5-trihydroxybenzyl hexoside I (e.g. crenatin)       | C <sub>13</sub> H <sub>18</sub> O <sub>9</sub>  | 317.0879                                   | 0.3            | 5   | 155.0340; <b>137.0242</b> ; 109.0293                                                                       |
| 9    | 1.163 | NHHP-HHDP-hexose I (e.g., castalagin/vescalagin)        | C <sub>41</sub> H <sub>26</sub> O <sub>26</sub> | 933.0640;<br>466.0328 [M-2H] <sup>2-</sup> | 1.8            | 29  | <b>933.0680</b> ; 915.0558; 871.0690; 631.0606; 569.0601; 467.0282; 300.9986                               |
| 10   | 1.260 | Dihydroxybenzoic acid hexoside                          | C <sub>13</sub> H <sub>16</sub> O <sub>9</sub>  | 315.0724                                   | 0.8            | 6   | 152.0111; 109.0293; <b>108.0219</b>                                                                        |
| 11   | 1.417 | 3,4,5-trihydroxybenzyl hexoside II                      | C <sub>13</sub> H <sub>18</sub> O <sub>9</sub>  | 317.0877                                   | -0.3           | 5   | 155.0343; <b>137.0242</b> ; 109.0292                                                                       |
| 12   | 1.535 | Galloyl hexose III                                      | C <sub>13</sub> H <sub>16</sub> O <sub>10</sub> | 331.0674                                   | 1.0            | 6   | 169.0142; <b>125.0244</b>                                                                                  |
| 13   | 1.632 | Bis-HHDP-hexose I (e.g., pedunculagin/casuariin)        | C <sub>34</sub> H <sub>24</sub> O <sub>22</sub> | 783.0700                                   | 1.7            | 23  | 783.0735; 481.0643; <b>300.9993</b> ; 275.0199                                                             |
| 14   | 1.768 | Galloyl shikimic acid                                   | C <sub>14</sub> H <sub>14</sub> O <sub>9</sub>  | 325.0554                                   | -3.4           | 8   | 325.0520; <b>169.0132</b> ; 125.0273; 124.0161                                                             |
| 15   | 1.827 | NHHP-HHDP-hexose II (e.g., castalagin/vescalagin)       | C <sub>41</sub> H <sub>26</sub> O <sub>26</sub> | 933.0641;<br>466.0326 [M-2H] <sup>2-</sup> | 0.2            | 29  | 613.0440; 467.0292; <b>300.9996</b> ; 299.9908; 275.0205; 257.0080; 229.0135; 169.0138                     |
| 16   | 2.087 | Galloyl shikimic acid                                   | C <sub>14</sub> H <sub>14</sub> O <sub>9</sub>  | 325.0563                                   | -0.6           | 8   | 271.1001; 169.0130; <b>125.0235</b> ; 124.0159; 93.0351                                                    |
| 17   | 2.187 | Galloyl dihydroxybenzoic acid                           | C <sub>14</sub> H <sub>10</sub> O <sub>8</sub>  | 305.0305                                   | 0.7            | 10  | 178.9974; 151.0028; <b>125.0236</b>                                                                        |
| 18   | 2.385 | Galloyl shikimic acid                                   | C <sub>14</sub> H <sub>14</sub> O <sub>9</sub>  | 325.0566                                   | -0.1           | 8   | 325.0532; 169.0141; <b>125.0237</b> ; 124.0265; 107.0138                                                   |
| 19   | 3.314 | Bis-HHDP-hexose II (e.g., pedunculagin/casuariin)       | C <sub>34</sub> H <sub>24</sub> O <sub>22</sub> | 783.0696                                   | 1.2            | 23  | 783.0720; 481.0624; <b>300.9984</b> ; 275.0188; 249.0396; 169.013                                          |
| 20   | 3.929 | <i>p</i> -Coumaric acid hexoside I                      | C <sub>15</sub> H <sub>18</sub> O <sub>8</sub>  | 325.0926                                   | -0.9           | 7   | 163.0470; <b>119.0481</b>                                                                                  |
| 21   | 4.589 | Galloyl-chebuloyl-HHDP-hexose I (e.g., chebulagic acid) | C <sub>41</sub> H <sub>30</sub> O <sub>27</sub> | 953.0901                                   | -0.1           | 27  | 953.0915; 909.1024; <b>785.0858</b> ; 765.0585; 425.0136; 300.9979; 299.9902; 275.0186                     |
| 22   | 4.609 | <i>p</i> -Coumaric acid hexoside II                     | C <sub>15</sub> H <sub>18</sub> O <sub>8</sub>  | 325.0926                                   | -0.9           | 7   | 163.0390; <b>119.0502</b>                                                                                  |
| 23   | 4.966 | HHDP-valoneoyl-hexose                                   | C <sub>41</sub> H <sub>28</sub> O <sub>27</sub> | 951.0761                                   | 1.7            | 28  | 951.0875; <b>907.0857</b> ; 889.0935; 783.0708; 605.0796; 481.0693; 425.0147; 300.9976                     |
| 24   | 4.988 | Caffeic acid hexoside                                   | C <sub>15</sub> H <sub>18</sub> O <sub>9</sub>  | 341.0871                                   | -1.2           | 7   | 179.0329; <b>135.0447</b>                                                                                  |
| 25   | 5.268 | Digalloyl-HHDP-hexose I                                 | C <sub>34</sub> H <sub>26</sub> O <sub>22</sub> | 785.0857                                   | 1.8            | 22  | 785.0889; 615.0645; 483.0799; 419.0620; <b>300.9987</b> ; 275.0193; 249.0400                               |
| 26   | 5.628 | 5-O-Caffeoyl quinic acid                                | C <sub>16</sub> H <sub>18</sub> O <sub>9</sub>  | 353.0884                                   | 1.7            | 8   | <b>191.0560</b> ; 85.0299                                                                                  |
| 27   | 6.004 | Galloyl-HHDP-hexose                                     | C <sub>27</sub> H <sub>22</sub> O <sub>18</sub> | 633.0742                                   | 1.8            | 17  | 633.0739; 463.0520; <b>300.9978</b> ; 275.0179; 249.0408                                                   |
| 28   | 6.004 | Galloyl-bis-HHDP-hexose I (e.g., stachyurin/casuarinin) | C <sub>41</sub> H <sub>28</sub> O <sub>26</sub> | 935.0818                                   | 2.1            | 28  | <b>935.0792</b> ; 917.0989; 873.0778; 855.0683; 783.0718; 633.0721; 571.0715; 300.9969; 299.0169; 275.0179 |

|    |        |                                                                                  |                                                 |                                               |      |    |                                                                                                               |
|----|--------|----------------------------------------------------------------------------------|-------------------------------------------------|-----------------------------------------------|------|----|---------------------------------------------------------------------------------------------------------------|
| 29 | 6.244  | Methylvaloneoyl-NHTP-hexose<br>(e.g., vescalonic/castavalonic acid methyl ester) | C <sub>49</sub> H <sub>32</sub> O <sub>31</sub> | 557.0405<br>[M-2H] <sup>2-</sup>              | 1.8  | 34 | 933.0706; 631.0572; 466.0307; 425.0188; 300.9994; 275.0215;<br><b>181.0134</b> ; 153.0201                     |
| 30 | 6.165  | Digalloyl hexose                                                                 | C <sub>20</sub> H <sub>20</sub> O <sub>14</sub> | 483.0788                                      | 1.6  | 11 | 483.0798; 331.0666; 313.0567; <b>271.0458</b> ; 211.0243; 169.0139;<br>125.0245                               |
| 31 | 6.560  | Galloyl-bis-HHDP-hexose II<br>(e.g., stachyurin/casuarinin)                      | C <sub>41</sub> H <sub>28</sub> O <sub>26</sub> | 935.0801                                      | 0.5  | 28 | <b>935.0826</b> ; 917.0730; 873.0830; 783.0713; 633.0740; 571.0753;<br>419.0628; 300.9979; 299.0187; 275.0184 |
| 32 | 6.500  | Galloyl-chebuloyl-HHDP-hexose II<br>(e.g., chebulagic acid)                      | C <sub>41</sub> H <sub>30</sub> O <sub>27</sub> | 953.0909                                      | 0.8  | 27 | <b>953.0966</b> ; 935.0828; 909.1031; 785.0875; 633.0771; 300.9982;<br>275.0194                               |
| 33 | 6.546  | Trigalloyl hexose I                                                              | C <sub>27</sub> H <sub>24</sub> O <sub>18</sub> | 635.0892                                      | 0.3  | 16 | 635.0875; 483.0810; 465.0678; <b>313.0540</b> ; 169.0131                                                      |
| 34 | 6.819  | Chesnatin                                                                        | C <sub>27</sub> H <sub>26</sub> O <sub>18</sub> | 637.1064                                      | 2.8  | 15 | 637.1036; 469.1002; <b>467.0857</b> ; 305.0299; 260.0327; 169.0143;<br>166.9984                               |
| 35 | 7.080  | 3-O- <i>p</i> -Coumaroyl quinic acid                                             | C <sub>16</sub> H <sub>18</sub> O <sub>8</sub>  | 337.0925                                      | -1.2 | 8  | <b>191.0561</b> ; 173.0450; 119.0500; 93.0342                                                                 |
| 36 | 7.218  | 3-O- <i>p</i> -Coumaroyl quinic acid                                             | C <sub>16</sub> H <sub>18</sub> O <sub>8</sub>  | 337.0933                                      | 1.2  | 8  | <b>191.0556</b> ; 173.0450; 119.0503; 93.0345                                                                 |
| 37 | 7.297  | Digalloyl-HHDP-hexose II                                                         | C <sub>34</sub> H <sub>26</sub> O <sub>22</sub> | 785.0856                                      | 1.7  | 22 | 785.0884; 633.0755; 483.0795; <b>300.9991</b> ; 275.0196; 249.0403                                            |
| 38 | 7.417  | Digalloyl deoxyhexose                                                            | C <sub>20</sub> H <sub>20</sub> O <sub>13</sub> | 467.0843                                      | 2.5  | 11 | 467.0840; 449.0731; <b>423.0933</b> ; 315.0715; 297.0611; 169.0137;<br>152.0112; 125.0238                     |
| 39 | 8.110  | Isochesnatin                                                                     | C <sub>27</sub> H <sub>26</sub> O <sub>18</sub> | 637.1063                                      | 2.6  | 15 | 593.1180; 469.1004; 293.0301; 261.0301; <b>169.0142</b>                                                       |
| 40 | 8.327  | Galloyl phenol hexoside I<br>(e.g., cretanin)                                    | C <sub>20</sub> H <sub>22</sub> O <sub>13</sub> | 469.0996                                      | 1.8  | 10 | <b>169.0150</b> ; 125.0250                                                                                    |
| 41 | 8.581  | Galloyl-bis-HHDP-hexose III                                                      | C <sub>41</sub> H <sub>28</sub> O <sub>26</sub> | 935.0797;<br>467.0375<br>[M-2H] <sup>2-</sup> | 0.1  | 28 | 391.0301; <b>300.9982</b> ; 299.9900; 275.0184; 169.0137                                                      |
| 42 | 8.721  | Galloyl phenol hexoside II                                                       | C <sub>20</sub> H <sub>22</sub> O <sub>13</sub> | 469.0997                                      | 2.0  | 10 | <b>169.0142</b> ; 125.0244                                                                                    |
| 43 | 8.919  | Trigalloyl hexose II                                                             | C <sub>27</sub> H <sub>24</sub> O <sub>18</sub> | 635.0905                                      | 2.4  | 16 | 635.0923; <b>483.0795</b> ; 465.0689; 313.0571; 271.0450; 169.0140                                            |
| 44 | 9.000  | Trigalloyl-valoneoyl-HHDP-hexose (e.g., rugosin A)                               | C <sub>48</sub> H <sub>34</sub> O <sub>31</sub> | 552.0490<br>[M-2H] <sup>2-</sup>              | 1.1  | 32 | 937.1942; 785.0853; 767.9712; 749.0615; 615.0636; 425.0152;<br><b>300.9987</b> ; 299.9907; 169.0137; 125.0242 |
| 45 | 9.455  | Trigalloyl-HHDP-hexose                                                           | C <sub>41</sub> H <sub>30</sub> O <sub>26</sub> | 937.0947;<br>468.0454<br>[M-2H] <sup>2-</sup> | -0.6 | 27 | 767.0768; 615.0654; 463.0522; <b>300.9995</b> ; 283.9963; 275.0199;<br>245.0086; 231.0301; 169.0149; 125.0253 |
| 46 | 9.595  | Quercetin pentosyl-hexoside                                                      | C <sub>26</sub> H <sub>28</sub> O <sub>16</sub> | 595.1318                                      | 2.3  | 13 | 595.1314; 343.0462; 301.0346; <b>300.0268</b> ; 271.0232                                                      |
| 47 | 9.704  | Tetragalloyl hexose                                                              | C <sub>34</sub> H <sub>28</sub> O <sub>22</sub> | 787.1007                                      | 1.0  | 21 | 787.1060; <b>635.0927</b> ; 617.0824; 573.0914; 465.0691; 313.0555;<br>295.0452; 169.0141                     |
| 48 | 9.704  | Ellagic acid pentoside                                                           | C <sub>19</sub> H <sub>14</sub> O <sub>12</sub> | 433.0415                                      | 0.6  | 13 | 433.0398; 300.9979; <b>299.9902</b> ; 244.0003                                                                |
| 49 | 9.754  | Chestanin                                                                        | C <sub>40</sub> H <sub>42</sub> O <sub>26</sub> | 937.1894                                      | 0.3  | 20 | 937.1921; 637.1066; 469.0992; <b>467.0824</b> ; 305.0297; 169.0139                                            |
| 50 | 9.969  | Quercetin hexuronide I                                                           | C <sub>21</sub> H <sub>18</sub> O <sub>13</sub> | 477.0686                                      | 2.6  | 13 | 477.0687; <b>301.0356</b> ; 283.0236; 255.0294; 227.0338; 151.0036                                            |
| 51 | 9.911  | Quercetin 3-O-hexoside I                                                         | C <sub>12</sub> H <sub>20</sub> O <sub>12</sub> | 463.0893                                      | 2.4  | 12 | 463.0894; 301.0351; <b>300.0276</b> ; 271.0243; 255.0295; 151.0033                                            |
| 52 | 10.009 | Rutin                                                                            | C <sub>27</sub> H <sub>30</sub> O <sub>16</sub> | 609.1479                                      | 2.9  | 13 | 609.1484; 301.0352; <b>300.0277</b> ; 271.0244; 255.0296                                                      |
| 53 | 10.067 | Quercetin 3-O-hexoside II                                                        | C <sub>12</sub> H <sub>20</sub> O <sub>12</sub> | 463.0892                                      | 2.2  | 12 | 463.0901; 301.0357; <b>300.0280</b> ; 271.0252; 255.0299; 243.0298                                            |
| 54 | 10.315 | Quercetin hexuronide II                                                          | C <sub>21</sub> H <sub>18</sub> O <sub>13</sub> | 477.0680                                      | 1.1  | 13 | 477.0687; <b>301.0356</b> ; 283.0236; 255.0300; 227.0338; 151.0036                                            |
| 55 | 10.315 | Quercetin 3-O-hexoside III                                                       | C <sub>12</sub> H <sub>20</sub> O <sub>12</sub> | 463.0890                                      | 1.7  | 12 | 463.0908; 301.0357; <b>300.0276</b> ; 271.0246; 255.0296; 151.0033                                            |
| 56 | 10.379 | Benzyl-dihydroxybenzoate-O-pentosil-hexoside I                                   | C <sub>25</sub> H <sub>30</sub> O <sub>13</sub> | 537.1624                                      | 1.9  | 11 | 429.1045; 297.0591; 243.0656; <b>153.0198</b> ; 135.0086                                                      |
| 57 | 10.515 | Quercetin 3-O-pentoside                                                          | C <sub>20</sub> H <sub>18</sub> O <sub>11</sub> | 433.0786                                      | 1.5  | 12 | 433.0773; 301.0346; <b>300.0270</b> ; 271.0240; 255.0289                                                      |
| 58 | 10.592 | Isochestanin                                                                     | C <sub>40</sub> H <sub>42</sub> O <sub>26</sub> | 937.1904                                      | 1.3  | 20 | 937.1939; 469.1001; <b>467.0853</b> ; 303.0303; 169.0143                                                      |
| 59 | 10.635 | Benzyl-dihydroxybenzoate-O-hexoside                                              | C <sub>20</sub> H <sub>22</sub> O <sub>9</sub>  | 405.1192                                      | 0.2  | 10 | 405.1164; 297.0611; 243.0643; 153.0195; <b>135.0082</b> ; 109.0284                                            |
| 60 | 10.810 | Kaempferol deoxyhexosyl-hexoside I                                               | C <sub>27</sub> H <sub>30</sub> O <sub>15</sub> | 593.1533                                      | 3.5  | 13 | 593.1545; <b>285.0405</b> ; 284.0330; 255.0301                                                                |
| 61 | 10.887 | Isorhamnetin deoxyhexoside I                                                     | C <sub>21</sub> H <sub>20</sub> O <sub>11</sub> | 447.0941                                      | 1.8  | 12 | 447.0949; 315.0140; 301.0358; 300.0280; 285.0408; 284.0333;<br>271.0246; <b>255.0302</b> ; 227.0350           |

|    |        |                                                                               |                                                 |                    |      |      |                                                                                                            |
|----|--------|-------------------------------------------------------------------------------|-------------------------------------------------|--------------------|------|------|------------------------------------------------------------------------------------------------------------|
| 62 | 11.099 | Isorhamnetin deoxyhexosyl-hexoside I                                          | C <sub>28</sub> H <sub>32</sub> O <sub>16</sub> | 623.1632           | 2.2  | 13   | 623.1650; <b>315.0513</b> ; 314.0435; 300.0273; 299.0195; 271.0244                                         |
| 63 | 11.176 | Kaempferol deoxyhexosyl-hexoside II                                           | C <sub>27</sub> H <sub>30</sub> O <sub>15</sub> | 593.1526           | 2.4  | 13   | 593.1557; <b>285.0409</b> ; 284.0328; 255.0299                                                             |
| 64 | 11.196 | Isorhamnetin 3-O-hexoside I                                                   | C <sub>22</sub> H <sub>22</sub> O <sub>12</sub> | 477.1046           | 1.6  | 12   | 477.1059; 315.0503; <b>314.0435</b> ; 300.0270; 299.0187; 271.0248                                         |
| 65 | 11.293 | Isorhamnetin deoxyhexoside II                                                 | C <sub>21</sub> H <sub>20</sub> O <sub>11</sub> | 447.0935           | 0.5  | 12   | 447.0932; 315.0142; 314.0065; 300.0266; 299.9910; 285.0394; 284.0319; 271.0240; <b>255.0296</b> ; 227.0344 |
| 66 | 11.293 | Isorhamnetin hexuronide                                                       | C <sub>22</sub> H <sub>20</sub> O <sub>13</sub> | 491.0841           | 2.0  | 13   | 491.0817; 315.0507; <b>300.0268</b> ; 271.0237; 255.0290                                                   |
| 67 | 11.510 | Isorhamnetin deoxyhexosyl-hexoside II                                         | C <sub>28</sub> H <sub>32</sub> O <sub>16</sub> | 623.1633           | 2.3  | 13   | 623.1647; <b>315.0508</b> ; 314.0428; 300.0273; 299.0195; 271.0244                                         |
| 68 | 11.570 | Isorhamnetin 3-O-hexoside II                                                  | C <sub>22</sub> H <sub>22</sub> O <sub>12</sub> | 477.1051           | 2.6  | 12   | 477.1049; 315.0495; <b>314.0422</b> ; 300.0273; 299.0194; 285.0405; 271.0248                               |
| 69 | 11.980 | Trimethylellagic acid hexose                                                  | C <sub>23</sub> H <sub>24</sub> O <sub>13</sub> | 551.1057<br>[M+FA] | n.c. | n.c. | 343.0457; <b>328.0216</b> ; 312.9983; 297.9743                                                             |
| 70 | 12.181 | Kaempferol acetylhexoside I                                                   | C <sub>23</sub> H <sub>22</sub> O <sub>12</sub> | 489.1058           | 4.0  | 13   | 489.1065; 285.0399; <b>284.0325</b> ; 255.0295; 227.0346                                                   |
| 71 | 12.402 | Quercetin                                                                     | C <sub>15</sub> H <sub>10</sub> O <sub>7</sub>  | 301.0354           | -0.3 | 11   | 301.0348; 273.0396; 227.0344; <b>151.0031</b> ; 107.0152                                                   |
| 72 | 12.737 | Luteolin                                                                      | C <sub>15</sub> H <sub>10</sub> O <sub>6</sub>  | 285.0398           | -2.3 | 11   | 285.0394; 241.0495; 175.0400; <b>133.0297</b>                                                              |
| 73 | 12.819 | Kaempferol acetylhexoside II                                                  | C <sub>23</sub> H <sub>22</sub> O <sub>12</sub> | 489.1051           | 2.6  | 13   | 489.1072; 285.0400; <b>284.0331</b> ; 255.0300; 227.0346                                                   |
| 74 | 13.160 | Benzyl-dihydroxybenzoate-O-pentosil-hexoside II                               | C <sub>25</sub> H <sub>30</sub> O <sub>13</sub> | 537.1635           | 4.0  | 11   | 537.1937; <b>243.0661</b> ; 152.0110; 108.0214                                                             |
| 75 | 13.729 | Quercetin <i>p</i> -coumaroyl-hexoside                                        | C <sub>30</sub> H <sub>26</sub> O <sub>14</sub> | 609.1258           | 1.3  | 18   | 609.1258; 463.0855; <b>301.0337</b> ; 300.0256; 271.0243; 151.0034                                         |
| 76 | 13.749 | Quercetin <i>p</i> -coumaroyl-deoxyhexosyl-hexoside I                         | C <sub>36</sub> H <sub>36</sub> O <sub>18</sub> | 755.1854           | 3.3  | 19   | 755.1878; 609.1496; 591.1388; <b>301.0350</b> ; 300.0270; 271.0248                                         |
| 77 | 13.769 | Kaempferol <i>p</i> -coumaroyl-hexoside I                                     | C <sub>30</sub> H <sub>26</sub> O <sub>13</sub> | 593.1326           | 2.4  | 13   | 593.1316; 447.0942; 307.0810; <b>285.0396</b> ; 284.0319; 255.0289                                         |
| 78 | 13.968 | Quercetin hexuronide butyl-ester                                              | C <sub>25</sub> H <sub>26</sub> O <sub>14</sub> | 533.1316           | 2.9  | 13   | 533.1324; 357.0983; 301.0350; <b>300.0278</b> ; 271.0243; 255.0291                                         |
| 79 | 13.968 | Quercetin <i>p</i> -coumaroyl- deoxyhexosil-hexoside II                       | C <sub>36</sub> H <sub>36</sub> O <sub>18</sub> | 755.1850           | 3.3  | 19   | 755.1866; 609.1486; 591.1374; <b>301.0353</b> ; 300.0276; 285.0399; 271.0248; 255.0291                     |
| 80 | 13.984 | Kaempferol                                                                    | C <sub>15</sub> H <sub>10</sub> O <sub>6</sub>  | 285.0403           | -0.6 | 11   | <b>285.0401</b> ; 255.0296; 227.0348; 107.0150                                                             |
| 81 | 14.174 | Trimethylellagic acid deoxyhexose                                             | C <sub>23</sub> H <sub>22</sub> O <sub>12</sub> | 535.1106<br>[M+FA] | n.c. | n.c. | 343.04600; <b>328.0226</b> ; 312.9990; 269.9802                                                            |
| 82 | 14.174 | Trimethylellagic acid I                                                       | C <sub>17</sub> H <sub>12</sub> O <sub>8</sub>  | 343.0455           | -1.3 | 12   | 328.0242; 312.9971; <b>297.9752</b> ; 269.9794                                                             |
| 83 | 14.366 | Kaempferol deoxyhexosyl- <i>p</i> -coumaroyl-hexoside I                       | C <sub>36</sub> H <sub>36</sub> O <sub>17</sub> | 739.1894           | 1.9  | 19   | 739.1915; 593.1530; 575.1424; 453.1399; <b>285.0401</b> ; 284.0318                                         |
| 84 | 14.436 | Traumatic acid                                                                | C <sub>12</sub> H <sub>20</sub> O <sub>4</sub>  | 227.1291           | 1.0  | 3    | <b>183.1388</b>                                                                                            |
| 85 | 14.561 | Kaempferol <i>p</i> -coumaroyl-hexoside II                                    | C <sub>30</sub> H <sub>26</sub> O <sub>13</sub> | 593.1311           | 1.7  | 13   | 447.0943; <b>285.0404</b> ; 284.0330; 255.0296                                                             |
| 86 | 14.643 | Kaempferol deoxyhexosyl- <i>p</i> -coumaroyl-hexoside II                      | C <sub>36</sub> H <sub>36</sub> O <sub>17</sub> | 739.1899           | 2.9  | 19   | 739.1955; 593.1567; 575.1453; 453.1426; <b>285.0417</b> ; 284.0335                                         |
| 87 | 15.139 | Trimethylellagic acid II                                                      | C <sub>17</sub> H <sub>12</sub> O <sub>8</sub>  | 343.0459           | -0.1 | 12   | 328.0222; 312.9985; <b>297.9753</b> ; 269.9796                                                             |
| 88 | 15.563 | Kaempferol acetyl <i>p</i> -coumaroyl-hexoside                                | C <sub>32</sub> H <sub>28</sub> O <sub>14</sub> | 635.1432           | 4.0  | 19   | 635.1441; 489.1068; <b>285.0404</b> ; 284.0324                                                             |
| 89 | 15.799 | Methylkaempferol                                                              | C <sub>16</sub> H <sub>12</sub> O <sub>6</sub>  | 299.0559           | -0.7 | 11   | 299.0550; <b>284.0320</b> ; 256.0368; 227.0336; 133.0298                                                   |
| 90 | 16.019 | 3,7,24-trihydroxy-cycloartene-28-oic acid hexoside                            | C <sub>36</sub> H <sub>58</sub> O <sub>10</sub> | 695.4037<br>[M+FA] | n.c. | 8    | 695.4039; 649.3972; <b>487.3450</b>                                                                        |
| 91 | 17.088 | Kaempferol di- <i>p</i> -coumaroyl hexoside I                                 | C <sub>39</sub> H <sub>32</sub> O <sub>15</sub> | 739.1695           | 3.6  | 24   | 739.1724; 593.1351; 453.1211; 307.0823; <b>285.0409</b> ; 284.0326                                         |
| 92 | 17.284 | Kaempferol di- <i>p</i> -coumaroyl hexoside II                                | C <sub>39</sub> H <sub>32</sub> O <sub>15</sub> | 739.1694           | 3.3  | 24   | 739.1715; 593.1337; 453.1211; <b>285.0409</b> ; 284.0323                                                   |
| 93 | 17.313 | Acacetin                                                                      | C <sub>16</sub> H <sub>12</sub> O <sub>5</sub>  | 283.0611           | -0.3 | 11   | 283.0594; <b>268.0363</b> ; 211.0385; 151.0027; 117.0342                                                   |
| 94 | 17.343 | 3,7-dihydroxynorcycloartane 24,28-dioic acid (e.g., castaartancrenoic acid A) | C <sub>27</sub> H <sub>42</sub> O <sub>6</sub>  | 461.2921           | 2.7  | 7    | <b>461.2908</b> ; 443.2804; 417.2991; 415.2841                                                             |
| 95 | 17.856 | Cycloartane-type triterpene                                                   | C <sub>30</sub> H <sub>50</sub> O <sub>6</sub>  | 505.3544           | 1.9  | 6    | <b>505.3553</b> ; 487.3429; 469.3327; 459.2758; 443.3201                                                   |
| 96 | 18.337 | Kaempferol acetyl di- <i>p</i> -coumaroyl hexoside I                          | C <sub>41</sub> H <sub>34</sub> O <sub>16</sub> | 781.1792           | 2.3  | 25   | 781.1803; 635.1434; 495.1325; <b>285.0401</b> ; 284.0320; 145.0287                                         |
| 97 | 18.594 | Kaempferol acetyl di- <i>p</i> -coumaroyl hexoside II                         | C <sub>41</sub> H <sub>34</sub> O <sub>16</sub> | 781.1797           | 2.9  | 25   | 781.1797; 635.1417; 495.1289; <b>285.0394</b> ; 284.0312; 145.0293                                         |
| 98 | 18.752 | Cycloartane-type triterpene                                                   | C <sub>27</sub> H <sub>42</sub> O <sub>5</sub>  | 445.2956           | -0.8 | 7    | <b>445.2959</b> ; 427.2842; 399.2893; 383.2949                                                             |
| 99 | 19.845 | Cycloartane-type triterpene                                                   | C <sub>30</sub> H <sub>48</sub> O <sub>5</sub>  | 487.3435           | 1.2  | 7    | <b>487.3439</b> ; 469.3326                                                                                 |

|     |        |                                                          |                                                  |                                |      |    |                                                                                        |
|-----|--------|----------------------------------------------------------|--------------------------------------------------|--------------------------------|------|----|----------------------------------------------------------------------------------------|
| 100 | 19.954 | Kaempferol di-acetyl di- <i>p</i> -coumaroyl hexoside I  | C <sub>43</sub> H <sub>36</sub> O <sub>17</sub>  | 823.1879                       | -0.1 | 26 | 823.1903; 677.1529; 659.1410; 617.1293; 537.1411; <b>285.0396</b> ; 284.0313; 145.0294 |
| 101 | 20.044 | Cycloartane-type triterpene                              | C <sub>30</sub> H <sub>48</sub> O <sub>5</sub>   | 487.3437                       | 1.6  | 7  | <b>487.3435</b> ; 469.3325; 441.3378; 383.2937                                         |
| 102 | 20.144 | Kaempferol di-acetyl di- <i>p</i> -coumaroyl hexoside II | C <sub>43</sub> H <sub>36</sub> O <sub>17</sub>  | 823.1885                       | 0.6  | 26 | 823.1916; 677.1551; 617.1326; 557.1125; <b>285.0406</b> ; 284.0325                     |
| 103 | 20.256 | Cycloartane-type triterpene                              | C <sub>30</sub> H <sub>48</sub> O <sub>5</sub>   | 487.3438                       | 1.8  | 7  | <b>487.3444</b> ; 469.3328                                                             |
| 104 | 20.425 | Pentacyclic triterpene                                   | C <sub>30</sub> H <sub>48</sub> O <sub>6</sub>   | 503.3383                       | 1.0  | 7  | 503.3394; <b>471.3130</b> ; 469.3319; 453.3015                                         |
| 105 | 20.606 | DGMG (18:3)                                              | C <sub>33</sub> H <sub>56</sub> O <sub>14</sub>  | 675.3601                       | 0.5  | 6  | 415.1457; 397.1344; <b>277.2172</b> ; 235.0804                                         |
| 106 | 20.721 | 9-oxooctadeca-10,12-dienoic acid                         | C <sub>18</sub> H <sub>32</sub> O <sub>3</sub>   | 293.2123                       | 0.3  | 4  | 293.2123; <b>275.2015</b> ; 231.2077; 183.1384                                         |
| 107 | 20.721 | Pentacyclic triterpene                                   | C <sub>30</sub> H <sub>48</sub> O <sub>6</sub>   | 503.3385                       | 1.4  | 7  | 503.3399; 485.3282; 471.3130; 445.2957; 401.2708; 387.2543; 359.2230; <b>319.1914</b>  |
| 108 | 21.100 | 9-oxooctadeca-10,12,15 trienoic acid                     | C <sub>18</sub> H <sub>28</sub> O <sub>3</sub>   | 291.1965                       | -0.2 | 5  | <b>291.1948</b> ; 273.1847; 247.2077; 211.1332; 195.1379                               |
| 109 | 21.318 | l-PA (18:3)                                              | C <sub>21</sub> H <sub>37</sub> O <sub>7</sub> P | 431.2212                       | 1.8  | 4  | 277.2166; <b>152.9959</b>                                                              |
| 110 | 21.846 | Pentacyclic triterpene                                   | C <sub>30</sub> H <sub>48</sub> O <sub>4</sub>   | 471.3501<br>517.3558<br>[M+FA] | 4.5  | 7  | <b>471.3513</b>                                                                        |
| 111 | 22.313 | l-PA (16:0)                                              | C <sub>19</sub> H <sub>39</sub> O <sub>7</sub> P | 409.2358                       | -0.6 | 1  | 409.2335; 255.2325; <b>152.9957</b>                                                    |
| 112 | 22.513 | Pentacyclic triterpene                                   | C <sub>30</sub> H <sub>48</sub> O <sub>4</sub>   | 471.3487                       | 1.5  | 7  | <b>471.3478</b>                                                                        |
| 113 | 22.654 | Pentacyclic triterpene                                   | C <sub>30</sub> H <sub>48</sub> O <sub>5</sub>   | 487.3440                       | 2.9  | 7  | 487.3430; 469.3330; 455.3172; 385.2745; <b>303.1957</b>                                |
| 114 | 22.695 | Pentacyclic triterpene                                   | C <sub>30</sub> H <sub>48</sub> O <sub>4</sub>   | 471.3480                       | 0.1  | 7  | <b>471.3480</b>                                                                        |
| 115 | 22.784 | Pentacyclic triterpene                                   | C <sub>30</sub> H <sub>48</sub> O <sub>5</sub>   | 487.3433                       | 0.8  | 7  | 487.3433; <b>455.3179</b>                                                              |
| 116 | 22.975 | Linolenic acid                                           | C <sub>18</sub> H <sub>30</sub> O <sub>2</sub>   | 277.2172                       | -0.4 | 4  | <b>277.2137</b>                                                                        |
| 117 | 23.115 | Pentacyclic triterpene                                   | C <sub>30</sub> H <sub>48</sub> O <sub>4</sub>   | 471.3483                       | 0.6  | 7  | <b>471.3482</b> ; 453.3371; 425.3433; 407.3324                                         |
| 118 | 23.215 | Pentacyclic triterpene (e.g. ursolic or oleanolic acid)  | C <sub>30</sub> H <sub>48</sub> O <sub>3</sub>   | 455.3537                       | 1.4  | 7  | <b>455.3552</b>                                                                        |
| 119 | 23.496 | Linoleic acid                                            | C <sub>18</sub> H <sub>32</sub> O <sub>2</sub>   | 279.2324                       | -2.0 | 3  | <b>279.2314</b>                                                                        |

**Table S2.** Effects of *C. sativa* L. extracts at different doses (50 and 200 mg) on fermentation end products after 24 h of incubation. Total VFA: total volatile fatty acids (acetate + propionate + butyrate + iso-butyrate + valerate + iso-valerate); AcA = acetic acid; PrA = propionic acid; ButA = Butyric acid; ValA = valeric acid; iso-ButA = iso-butyric acid; iso-ValA = iso-valeric acid; BCFA= branched chain fatty acids (iso-butyrate + iso-valerate/tVFA); A/P=Acetate/Propionate. Along the row \*  $p < 0.05$ , \*\*  $p < 0.01$  and \*\*\*  $p < 0.001$ ; NS: not significant; MSE: mean square error.

|                    | Control diet | Cs/1/1             |                    | Cs/2/1             |                    | Cs/3/2             |                    | MSE  |
|--------------------|--------------|--------------------|--------------------|--------------------|--------------------|--------------------|--------------------|------|
|                    |              | 50mg               | 200mg              | 50mg               | 200mg              | 50mg               | 200mg              |      |
| pH                 | 6.32         | 6.34 <sup>NS</sup> | 6.24 <sup>NS</sup> | 6.35 <sup>NS</sup> | 6.34 <sup>NS</sup> | 6.35 <sup>NS</sup> | 6.71 <sup>NS</sup> | 0.02 |
| Total VFA (mmol/L) | 41.6         | 55.0***            | 54.3***            | 47.4***            | 58.5***            | 49.5**             | 38.7***            | 0.74 |
| AcA (% VFA)        | 62.4         | 56.2***            | 55.9***            | 59.7*              | 56.6***            | 64.7 <sup>NS</sup> | 61.4 <sup>NS</sup> | 0.58 |
| PrA (% VFA)        | 17.6         | 21.3***            | 22.6***            | 17.7 <sup>NS</sup> | 19.5*              | 17.1 <sup>NS</sup> | 18.2 <sup>NS</sup> | 0.23 |
| ButA (% VFA)       | 13.9         | 19.6***            | 18.8***            | 19.7***            | 20.9***            | 15.6*              | 18.3***            | 0.16 |

|                            |      |                    |         |                    |                    |                    |                    |       |
|----------------------------|------|--------------------|---------|--------------------|--------------------|--------------------|--------------------|-------|
| <b>ValA</b><br>(% VFA)     | 3.70 | 1.97***            | 2.11*** | 1.79***            | 1.87***            | 1.52***            | 1.44***            | 0.02  |
| <b>iso-ButA</b><br>(% VFA) | 0.61 | 0.50 <sup>NS</sup> | 0.24**  | 0.51 <sup>NS</sup> | 0.50 <sup>NS</sup> | 0.50 <sup>NS</sup> | 0.28**             | 0.005 |
| <b>iso-ValA</b><br>(% VFA) | 1.67 | 0.44***            | 0.38*** | 0.51***            | 0.54***            | 0.45***            | 0.36***            | 0.001 |
| <b>BCFA</b><br>(%VFA)      | 2.29 | 0.97***            | 0.62*** | 1.02***            | 1.04***            | 0.95***            | 0.64***            | 0.004 |
| <b>A/P</b><br>(%VFA)       | 3.53 | 2.64***            | 2.47*** | 3.37 <sup>NS</sup> | 2.90**             | 3.77 <sup>NS</sup> | 3.37 <sup>NS</sup> | 0.01  |

**Table S3.** Values of Pearson's coefficient correlation, between antiradical (DPPH•, ABTS••) activities, reducing activity (PFRAP), total phenol content (TPC), total flavonoid content (TFC) with fermentation parameters at the dose level of 50 mg. tVFA: total volatile fatty acids; AcA = acetic acid; PrA = propionic acid; ButA = Butyric acid; ValA = valeric acid; iso-ButA = iso-butyric acid; iso-ValA = iso-valeric acid; BCFA: branched chain fatty acids (iso-butyrate + iso-valerate/tVFA); A/P=Acetate/Propionate; OMD: organic matter degradability; OMCV: cumulative volume of gas related to incubated organic matter. R<sub>max</sub>: maximum fermentation rate; T<sub>max</sub>: time at which R<sub>max</sub> occurs.



|                        | <i>TFC</i> | <i>TPC</i> | <i>ABTS</i> | <i>DPPH</i> | <i>FRAP</i> | <i>pH</i> | <i>tVFA</i> | <i>AcA</i> | <i>PrA</i> | <i>ButA</i> | <i>ValA</i> | <i>iso-ButA</i> | <i>iso-ValA</i> | <i>BCFA</i> | <i>A/P</i> | <i>OMD</i> | <i>OMCV</i> | <i>R<sub>max</sub></i> | <i>T<sub>max</sub></i> |
|------------------------|------------|------------|-------------|-------------|-------------|-----------|-------------|------------|------------|-------------|-------------|-----------------|-----------------|-------------|------------|------------|-------------|------------------------|------------------------|
| <i>TFC</i>             | 1,000      |            |             |             |             |           |             |            |            |             |             |                 |                 |             |            |            |             |                        |                        |
| <i>TPC</i>             | 0,935      | 1,000      |             |             |             |           |             |            |            |             |             |                 |                 |             |            |            |             |                        |                        |
| <i>ABTS</i>            | 0,985      | 0,982      | 1,000       |             |             |           |             |            |            |             |             |                 |                 |             |            |            |             |                        |                        |
| <i>DPPH</i>            | 0,968      | 0,994      | 0,997       | 1,000       |             |           |             |            |            |             |             |                 |                 |             |            |            |             |                        |                        |
| <i>FRAP</i>            | 0,927      | 1,000      | 0,978       | 0,991       | 1,000       |           |             |            |            |             |             |                 |                 |             |            |            |             |                        |                        |
| <i>pH</i>              | -0,949     | -0,999     | -0,989      | -0,998      | -0,998      | 1,000     |             |            |            |             |             |                 |                 |             |            |            |             |                        |                        |
| <i>tVFA</i>            | 0,998      | 0,913      | 0,973       | 0,952       | 0,904       | -0,929    | 1,000       |            |            |             |             |                 |                 |             |            |            |             |                        |                        |
| <i>AcA</i>             | 0,207      | -0,153     | 0,036       | -0,044      | -0,174      | 0,111     | 0,263       | 1,000      |            |             |             |                 |                 |             |            |            |             |                        |                        |
| <i>PrA</i>             | 0,607      | 0,849      | 0,735       | 0,786       | 0,860       | -0,826    | 0,560       | -0,652     | 1,000      |             |             |                 |                 |             |            |            |             |                        |                        |
| <i>ButA</i>            | -0,873     | -0,989     | -0,944      | -0,967      | -0,992      | 0,982     | -0,843      | 0,297      | -0,918     | 1,000       |             |                 |                 |             |            |            |             |                        |                        |
| <i>ValA</i>            | -0,602     | -0,280     | -0,456      | -0,384      | -0,260      | 0,321     | -0,648      | -0,906     | 0,269      | 0,136       | 1,000       |                 |                 |             |            |            |             |                        |                        |
| <i>Iso-ButA</i>        | 0,608      | 0,287      | 0,462       | 0,390       | 0,266       | -0,327    | 0,653       | 0,903      | -0,262     | -0,143      | -1,000      | 1,000           |                 |             |            |            |             |                        |                        |
| <i>Iso-ValA</i>        | -0,677     | -0,894     | -0,794      | -0,840      | -0,903      | 0,874     | -0,634      | 0,579      | -0,996     | 0,950       | -0,179      | 0,172           | 1,000           |             |            |            |             |                        |                        |
| <i>BCFA</i>            | -0,383     | -0,686     | -0,536      | -0,602      | -0,701      | 0,654     | -0,329      | 0,825      | -0,967     | 0,785       | -0,507      | 0,501           | 0,939           | 1,000       |            |            |             |                        |                        |
| <i>A/P</i>             | -0,473     | -0,755     | -0,618      | -0,678      | -0,768      | 0,726     | -0,421      | 0,764      | -0,987     | 0,843       | -0,418      | 0,412           | 0,969           | 0,995       | 1,000      |            |             |                        |                        |
| <i>OMD</i>             | 0,888      | 0,993      | 0,954       | 0,975       | 0,996       | -0,987    | 0,860       | -0,267     | 0,905      | -1,000      | -0,167      | 0,174           | -0,940          | -0,765      | -0,826     | 1,000      |             |                        |                        |
| <i>OMCV</i>            | 0,979      | 0,844      | 0,930       | 0,898       | 0,832       | -0,866    | 0,989       | 0,401      | 0,434      | -0,756      | -0,751      | 0,756           | -0,514          | -0,188      | -0,285     | 0,776      | 1,000       |                        |                        |
| <i>R<sub>max</sub></i> | -0,914     | -0,998     | -0,970      | -0,986      | -0,999      | 0,995     | -0,889      | 0,207      | -0,877     | 0,996       | 0,227       | -0,234          | 0,917           | 0,724       | 0,790      | -0,998     | -0,813      | 1,000                  |                        |
| <i>T<sub>max</sub></i> | 0,578      | 0,251      | 0,429       | 0,356       | 0,230       | -0,292    | 0,624       | 0,918      | -0,298     | -0,106      | -1,000      | 0,999           | 0,209           | 0,533       | 0,446      | 0,137      | 0,731       | -0,197                 | 1,000                  |

**Table S4.** Values of Pearson's coefficient correlation, between antiradical (DPPH•, ABTS••) activities, reducing activity (PFRAP), total phenol content (TPC), total flavonoid content (TFC) with fermentation parameters at the dose level of 200 mg. tVFA: total volatile fatty acids; AcA = acetic acid; PrA = propionic acid; ButA = Butyric acid; ValA = valeric acid; iso-ButA = iso-butyric acid; iso-ValA = iso-valeric acid; BCFA: branched chain fatty acids (iso-butyrate + iso-valerate/tVFA); A/P=Acetate/Propionate; OMD: organic matter degradability; OMCV: cumulative volume of gas related to incubated organic matter. R<sub>max</sub>: maximum fermentation rate; T<sub>max</sub>: time at which R<sub>max</sub> occurs.

|  | <i>TFC</i> | <i>TPC</i> | <i>ABTS</i> | <i>DPPH</i> | <i>FRAP</i> | <i>pH</i> | <i>tVFA</i> | <i>AcA</i> | <i>PrA</i> | <i>ButA</i> | <i>ValA</i> | <i>iso-ButA</i> | <i>iso-ValA</i> | <i>BCFA</i> | <i>A/P</i> | <i>OMD</i> | <i>OMCV</i> | <i>R<sub>max</sub></i> | <i>T<sub>max</sub></i> |
|--|------------|------------|-------------|-------------|-------------|-----------|-------------|------------|------------|-------------|-------------|-----------------|-----------------|-------------|------------|------------|-------------|------------------------|------------------------|
|--|------------|------------|-------------|-------------|-------------|-----------|-------------|------------|------------|-------------|-------------|-----------------|-----------------|-------------|------------|------------|-------------|------------------------|------------------------|

|                        |        |        |        |        |        |        |        |        |        |        |        |        |        |        |        |       |       |        |       |
|------------------------|--------|--------|--------|--------|--------|--------|--------|--------|--------|--------|--------|--------|--------|--------|--------|-------|-------|--------|-------|
| <i>TFC</i>             | 1,00   |        |        |        |        |        |        |        |        |        |        |        |        |        |        |       |       |        |       |
| <i>TPC</i>             | 0,935  | 1,000  |        |        |        |        |        |        |        |        |        |        |        |        |        |       |       |        |       |
| <i>ABTS</i>            | 0,985  | 0,982  | 1,000  |        |        |        |        |        |        |        |        |        |        |        |        |       |       |        |       |
| <i>DPPH</i>            | 0,968  | 0,994  | 0,997  | 1,000  |        |        |        |        |        |        |        |        |        |        |        |       |       |        |       |
| <i>FRAP</i>            | 0,927  | 1,000  | 0,978  | 0,991  | 1,000  |        |        |        |        |        |        |        |        |        |        |       |       |        |       |
| <i>pH</i>              | -0,340 | -0,651 | -0,497 | -0,564 | -0,667 | 1,000  |        |        |        |        |        |        |        |        |        |       |       |        |       |
| <i>tVFA</i>            | -0,951 | -0,779 | -0,884 | -0,844 | -0,766 | 0,033  | 1,000  |        |        |        |        |        |        |        |        |       |       |        |       |
| <i>AcA</i>             | 0,765  | 0,944  | 0,864  | 0,902  | 0,950  | -0,866 | -0,528 | 1,000  |        |        |        |        |        |        |        |       |       |        |       |
| <i>PrA</i>             | -0,512 | -0,783 | -0,652 | -0,710 | -0,796 | 0,982  | 0,221  | -0,945 | 1,000  |        |        |        |        |        |        |       |       |        |       |
| <i>ButA</i>            | -0,488 | -0,147 | -0,331 | -0,255 | -0,126 | -0,655 | 0,734  | 0,189  | -0,500 | 1,000  |        |        |        |        |        |       |       |        |       |
| <i>ValA</i>            | -0,895 | -0,995 | -0,959 | -0,978 | -0,997 | 0,723  | 0,714  | -0,972 | 0,841  | 0,049  | 1,000  |        |        |        |        |       |       |        |       |
| <i>iso-ButA</i>        | -0,949 | -0,776 | -0,881 | -0,840 | -0,762 | 0,027  | 1,000  | -0,523 | 0,215  | 0,738  | 0,710  | 1,000  |        |        |        |       |       |        |       |
| <i>iso-ValA</i>        | -0,537 | -0,801 | -0,674 | -0,731 | -0,814 | 0,976  | 0,249  | -0,954 | 1,000  | -0,474 | 0,856  | 0,244  | 1,000  |        |        |       |       |        |       |
| <i>BCFA</i>            | -0,272 | -0,595 | -0,433 | -0,503 | -0,612 | 0,997  | -0,039 | -0,828 | 0,966  | -0,707 | 0,672  | -0,045 | 0,958  | 1,000  |        |       |       |        |       |
| <i>A/P</i>             | 0,652  | 0,878  | 0,773  | 0,821  | 0,888  | -0,935 | -0,385 | 0,987  | -0,985 | 0,344  | -0,921 | -0,380 | -0,990 | -0,907 | 1,000  |       |       |        |       |
| <i>OMD</i>             | 0,521  | 0,185  | 0,367  | 0,292  | 0,164  | 0,625  | -0,760 | -0,151 | 0,466  | -0,999 | -0,087 | -0,763 | 0,440  | 0,680  | -0,307 | 1,000 |       |        |       |
| <i>OMCV</i>            | 0,603  | 0,281  | 0,457  | 0,385  | 0,261  | 0,545  | -0,820 | -0,052 | 0,376  | -0,991 | -0,185 | -0,824 | 0,349  | 0,604  | -0,211 | 0,995 | 1,000 |        |       |
| <i>R<sub>max</sub></i> | -0,550 | -0,810 | -0,686 | -0,741 | -0,823 | 0,972  | 0,265  | -0,959 | 0,999  | -0,460 | 0,864  | 0,259  | 1,000  | 0,953  | -0,992 | 0,426 | 0,334 | 1,000  |       |
| <i>T<sub>max</sub></i> | 0,966  | 0,995  | 0,996  | 1,000  | 0,993  | -0,573 | -0,838 | 0,906  | -0,717 | -0,245 | -0,980 | -0,835 | -0,738 | -0,512 | 0,827  | 0,282 | 0,375 | -0,748 | 1,000 |
